# Supplementary material for: Defence Responses of Arabidopsis thaliana to Infection by Pseudomonas syringae Are Regulated by the Circadian Clock
Source: PubMed Central journal article supplement (PMC3205005; doi:10.1371/journal.pone.0026968), 2011-10-31

**Figure S3:** Bacterial titres ( $\pm$  SEM,  $n=3$ ) at 4 hpi following infection with  $10^6$  cfu mL<sup>-1</sup> *Pst* DC3000 (corresponding to  $10^4$  colony forming units cm<sup>-2</sup>). Plants were grown in 16 h: light 8 h dark cycles at 22 °C for 3 weeks prior to transfer to constant light at CT 0. Infections were carried out in constant light at the times indicated.

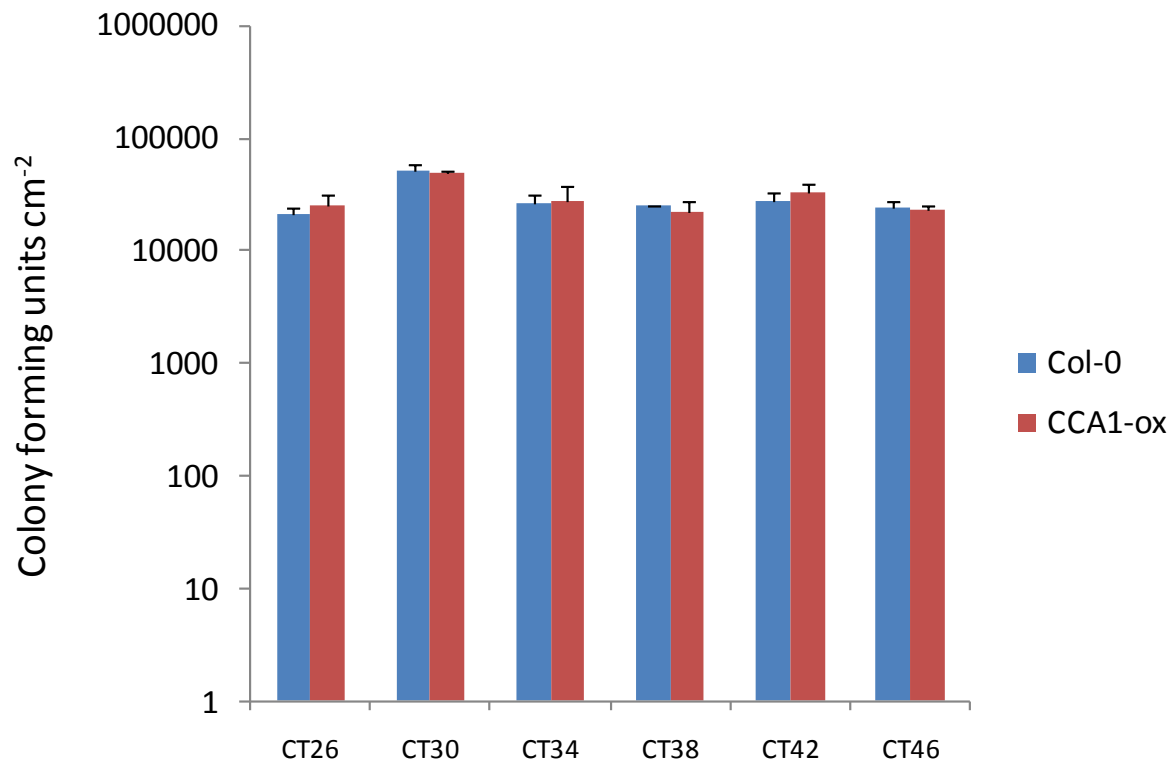

Supplement: pone.0026968.s003.pdf [file pone.0026968.s003.pdf]
