# Supplementary material for: Defence Responses of Arabidopsis thaliana to Infection by Pseudomonas syringae Are Regulated by the Circadian Clock
Source: PubMed Central journal article supplement (PMC3205005; doi:10.1371/journal.pone.0026968), 2011-10-31
Supplement: pone.0026968.s005.pdf [file pone.0026968.s005.pdf]

**Table S2:** Genes exhibiting diurnal expression pattern. Genes highlighted in blue also display circadian patterns of expression. Known circadian genes *CCA1* and *LHY* are highlighted in red. Genes determined to have circadian expression by both Multi Experiment Viewer clustering and HAYSTACK are indicated in bold. The cluster into which each gene falls (in Figure S1) and the phase of transcript accumulation according to HAYSTACK is indicated.

| Probe ID         | Locus                                                           | Cluster  | phase       |
|------------------|-----------------------------------------------------------------|----------|-------------|
| <b>256243_at</b> | <b>At3g12500_BASIC CHITINASE (CHI-B); (B-CHI)</b>               | <b>1</b> | <b>CT22</b> |
| 248895_at        | AT5G46330_FLAGELLIN-SENSITIVE 2 (FLS2)                          | 1        |             |
| 248719_at        | AT5G47910_RESPIRATORY BURST OXIDASE HOMOLOGUE D (RBOHD)         | 1        |             |
| <b>248247_at</b> | <b>AT5G53210_SPEECHLESS (SPCH)</b>                              | <b>1</b> | <b>CT03</b> |
| 256425_at        | AT1G33560_ACTIVATED DISEASE RESISTANCE 1 (ADR1)                 | 2        |             |
| <b>260116_at</b> | <b>AT1G33960_AVRPT2-INDUCED GENE 1 (AIG1)</b>                   | <b>2</b> | <b>CT00</b> |
| 260133_at        | AT1G66340_ETHYLENE RESPONSE 1 (ETR1)                            | 2        |             |
| 262177_at        | AT1G74710_ISOCHORISMATE SYNTHASE 1 (ICS1)                       | 2        |             |
| 266893_at        | AT2G26070_REVERSION-TO-ETHYLENE SENSITIVITY1 (RTE1)             | 2        |             |
| <b>254652_at</b> | <b>AT4G18170_(AtWRKY28)</b>                                     | <b>2</b> | <b>CT03</b> |
| 245690_at        | AT5G04230_PHENYL ALANINE AMMONIA-LYASE 3 (PAL3)                 | 2        |             |
| 261569_at        | AT1G01060_LATE ELONGATED HYPOCOTYL (LHY)                        | 5        | CT23        |
| <b>261564_at</b> | <b>AT1G01720_(ATAF1)</b>                                        | <b>5</b> |             |
| 264780_at        | AT1G08720_ENHANCED DISEASE RESISTANCE 1 (EDR1); (ATEDR1)        | 5        |             |
| <b>261135_at</b> | <b>At1g19610_(PDF1.4)</b>                                       | <b>5</b> | <b>CT21</b> |
| <b>261150_at</b> | <b>AT1G19640_JASMONIC ACID CARBOXYL METHYLTRANSFERASE (JMT)</b> | <b>5</b> | <b>CT22</b> |
| 259802_at        | AT1G72260_THIONIN 2.1 (THI2.1); (THI2.1.1)                      | 5        |             |
| 261402_at        | AT1G79670_RESISTANCE TO FUSARIUM OXYSPORUM 1 (RFO1); (WAKL22)   | 5        |             |
| <b>266141_at</b> | <b>At2g02120_(PDF2.1)</b>                                       | <b>5</b> | <b>CT00</b> |
| 265934_at        | AT2G19560_ENHANCED ETHYLENE RESPONSE 5 (EER5)                   | 5        |             |
| <b>245051_at</b> | <b>AT2G23320_(WRKY15)</b>                                       | <b>5</b> | <b>CT22</b> |
| <b>257365_at</b> | <b>At2g26020_plant defensin 1.2b (PDF1.2b)</b>                  | <b>5</b> | <b>CT01</b> |
| 266992_at        | AT2G39200_MILDEW RESISTANCE LOCUS O 12 (MLO12)                  | 5        |             |
| 267346_at        | AT2G39940_CORONATINE INSENSITIVE 1 (COI1)                       | 5        |             |
| 260571_at        | AT2G43790_MAP KINASE 6 (MPK6);MAP KINASE 6 (MAPK6)              | 5        |             |
| 266719_at        | AT2G46830_CIRCADIAN CLOCK ASSOCIATED 1 (CCA1)                   | 5        | CT00        |
| 256397_at        | AT3G06110_MAPK PHOSPHATASE 2 (MKP2)                             | 5        |             |
| <b>259149_at</b> | <b>AT3G10340_Phenylalanine ammonia-lyase 4 (PAL4)</b>           | <b>5</b> | <b>CT23</b> |
| <b>258434_at</b> | <b>AT3G16770_;ETHYLENE RESPONSE FACTOR 72 (ERF72)</b>           | <b>5</b> | <b>CT01</b> |
| 258189_at        | AT3G17860_JASMONATE-ZIM-DOMAIN PROTEIN 3 (JAZ3)                 | 5        |             |
| <b>251984_at</b> | <b>AT3G53260_PHENYLALANINE AMMONIA-LYASE 2 (PAL2)</b>           | <b>5</b> | <b>CT23</b> |
| <b>251864_at</b> | <b>AT3G54920_powdery mildew resistant 6 (PMR6)</b>              | <b>5</b> | <b>CT21</b> |
| <b>255568_at</b> | <b>AT4G01250_(WRKY22); (AtWRKY22)</b>                           | <b>5</b> | <b>CT21</b> |
| 245249_at        | AT4G16760_ACYL-COA OXIDASE 1 (ACX1); (ATACX1)                   | 5        |             |
| 250421_at        | AT5G11270_OVEREXPRESSOR OF CATIONIC PEROXIDASE 3 (OCP3)         | 5        |             |
| 246510_at        | AT5G15410_DEFENSE NO DEATH 1 (DND1)                             | 5        |             |
| <b>248994_at</b> | <b>AT5G45250_RESISTANT TO P. SYRINGAE 4 (RPS4)</b>              | <b>5</b> | <b>CT21</b> |

|           |                                                                  |   |      |
|-----------|------------------------------------------------------------------|---|------|
| 248684_at | AT5G48485_DEFECTIVE IN INDUCED RESISTANCE 1 (DIR1)               | 5 | CT22 |
| 247259_at | AT5G64930_CONSTITUTIVE EXPRESSION OF PR GENES 5 (CPR5)           | 5 | CT23 |
| 245986_at | AT5G13160_avrPphB susceptible 1 (PBS1)                           | 5 |      |
| 256017_at | AT1G19180_JASMONATE-ZIM-DOMAIN PROTEIN 1 (JAZ1);                 | 6 | CT07 |
| 261713_at | AT1G32640_JASMONATE INSENSITIVE 1 (JIN1); (MYC2))                | 6 | CT10 |
| 262899_at | AT1G59870_PENETRATION 3 (PEN3)                                   | 6 | CT10 |
| 265530_at | AT2G06050_OPDA-REDUCTASE 3 (OPR3)                                | 6 | CT10 |
| 267392_at | AT2G44490_penetration 2 (PEN2);BETA GLUCOSIDASE 26 (BGLU26)      | 6 | CT10 |
| 263786_at | AT2G46370_JASMONATE RESISTANT 1 (JAR1)                           | 6 |      |
| 258791_at | At3g04720_PATHOGENESIS-RELATED 4 (PR4)                           | 6 |      |
| 258046_at | AT3G21220_(ATMCK5)                                               | 6 |      |
| 258173_at | AT3G21630_Chitin Elicitor Receptor Kinase 1 (CERK1)              | 6 |      |
| 252373_at | AT3G48090_enhanced disease susceptibility 1 (EDS1)               | 6 |      |
| 254232_at | AT4G23600_CORONATINE INDUCED 1 (CORI3)                           | 6 | CT10 |
| 246082_at | AT5G20480_EF-TU RECEPTOR (EFR)                                   | 6 | CT09 |
| 249754_at | AT5G24530_DOWNY MILDEW RESISTANT 6 (DMR6)                        | 6 |      |
| 249560_at | At5g38330_Low-molecular-weight cysteine-rich 80 (LCR80)          | 6 | CT07 |
| 249208_at | AT5G42650_ALLENE OXIDE SYNTHASE (AOS)                            | 6 | CT10 |
| 249052_at | At5g44420_PLANT DEFENSIN 1.2 (PDF1.2)                            | 6 |      |
| 264595_at | AT1G04750_VESICLE-ASSOCIATED MEMBRANE PROTEIN 721                | 7 |      |
| 262455_at | AT1G11310_MILDEW RESISTANCE LOCUS O 2 (MLO2)                     | 7 |      |
| 261662_at | AT1G18350_MAP KINASE KINASE7 (ATMCK7)                            | 7 | CT11 |
| 255786_at | AT1G19670_CORONATINE-INDUCED PROTEIN 1 (ATCLH1)                  | 7 |      |
| 259561_at | AT1G21250_CELL WALL-ASSOCIATED KINASE (WAK1); (PRO25)            | 7 | CT10 |
| 256183_at | AT1G51660_(MCK4)                                                 | 7 |      |
| 265008_at | AT1G61560_MILDEW RESISTANCE LOCUS O 6 (MLO6)                     | 7 |      |
| 259764_at | AT1G64280_NONEXPRESSER OF PR GENES 1 (NPR1)                      | 7 |      |
| 259925_at | AT1G75040_PATHOGENESIS-RELATED GENE 5 (PR5); (PR-5)              | 7 | CT11 |
| 262679_at | At1g75830_PLANT DEFENSIN 1.2 (PDF1.1)                            | 7 | CT12 |
| 266119_at | At2g02100_(PDF2.2)                                               | 7 | CT10 |
| 266118_at | At2g02130_(PDF2.3)                                               | 7 |      |
| 245038_at | At2g26560_PHOSPHOLIPASE A 2A (PLP2)                              | 7 | CT10 |
| 263478_at | AT2G31880_SUPPRESSOR OF BIR1 1 (SOBIR1)                          | 7 |      |
| 245168_at | AT2G33150_(KAT2)                                                 | 7 |      |
| 258786_at | AT3G11820_PENETRATION1 (PEN1)                                    | 7 |      |
| 257053_at | At3g15210_ETHYLENE RESPONSIVE ELEMENT BINDING FACTOR 4 (ATERF-4) | 7 |      |
| 251705_at | AT3G56400_(WRKY70)                                               | 7 | CT10 |
| 255624_at | AT4G01370_MPK4                                                   | 7 |      |
| 253993_at | AT4G26070_(MCK1)                                                 | 7 | CT10 |
| 253997_at | AT4G26090_RESISTANT TO P. SYRINGAE 2 (RPS2)                      | 7 | CT10 |
| 247786_at | AT5G58600_POWDERY MILDEW RESISTANT 5 (PMR5)                      | 7 | CT13 |
| 247337_at | At5g63660_(PDF2.5)                                               | 7 | CT13 |
| 259451_at | AT1G13890_(SNAP30)                                               | 9 |      |
| 245731_at | AT1G73500_MAP KINASE KINASE 9 (MCK9)                             | 9 |      |
| 257927_at | AT3G23240_ETHYLENE RESPONSE FACTOR 1 (ERF1)                      | 9 | CT16 |

|           |                                                          |    |      |
|-----------|----------------------------------------------------------|----|------|
| 258002_at | At3g28930_AVRRPT2-INDUCED GENE 2 (AIG2)                  | 9  | CT13 |
| 254889_at | At4g11650_osmotin 34 (ATOSM34)                           | 9  | CT16 |
| 252921_at | AT4G39030_ENHANCED DISEASE SUSCEPTIBILITY 5 (EDS5)       | 9  |      |
| 250551_at | AT5G07880_(SNAP29)                                       | 9  | CT11 |
| 249645_at | At5g36910_THIONIN 2.2 (THI2.2)                           | 9  | CT10 |
| 262344_at | AT1G64060_RESPIRATORY BURST OXIDASE PROTEIN F (ATRBOH F) | 10 |      |
| 267028_at | AT2G38470_(WRKY33)                                       | 10 |      |
| 252592_at | AT3G45640_(ATMAPK3)                                      | 10 |      |
| 255378_at | AT4G03550_GLUCAN SYNTHASE-LIKE 5 (ATGSL05)               | 10 |      |
| 253646_at | AT4G29810_MAP KINASE KINASE 2 (MKK2);                    | 10 | CT11 |
| 266385_at | AT2G14610_PATHOGENESIS-RELATED GENE 1 (PR1)              | 10 | CT08 |
| 254211_at | AT4G23570_(SGT1A)                                        | 10 |      |
| 253535_at | AT4G31550_(AtWRKY11)                                     | 10 | CT09 |
| 259719_at | At1g61070_PLANT DEFENSIN 2.4 (PDF2.4)                    |    | CT12 |
| 266115_at | At2g02140_(PDF2.6)                                       |    | CT20 |
| 252170_at | AT3G50480_HOMOLOG OF RPW8 4 (HR4)                        |    | CT17 |
| 252060_at | AT3G52430_PHYTOALEXIN DEFICIENT 4 (PAD4)                 |    | CT17 |
| 251625_at | AT3G57260_PATHOGENESIS-RELATED PROTEIN 2 (PR2)           |    | CT11 |
