# Supplementary material for: Defence Responses of Arabidopsis thaliana to Infection by Pseudomonas syringae Are Regulated by the Circadian Clock
Source: PubMed Central journal article supplement (PMC3205005; doi:10.1371/journal.pone.0026968), 2011-10-31
Supplement: pone.0026968.s006.pdf [file pone.0026968.s006.pdf]

**Table S3:** Genes exhibiting circadian expression pattern. Genes highlighted in yellow also display diurnal patterns of expression. Known circadian genes *CCA1* and *LHY* are highlighted in red. Genes determined to have circadian expression by both Multi Experiment Viewer clustering and HAYSTACK are indicated in bold. The cluster into which each gene falls (in Figure S2) and the phase of transcript accumulation according to HAYSTACK is indicated.

| Probe ID         | Locus                                                                                       | Cluster  | phase       |
|------------------|---------------------------------------------------------------------------------------------|----------|-------------|
| 261135_at        | At1g19610_ (PDF1.4)                                                                         | 1        |             |
| 261394_at        | AT1G79680_wak110                                                                            | 1        |             |
| <b>266115_at</b> | <b>At2g02140_ (PDF2.6)</b>                                                                  | <b>1</b> | <b>CT03</b> |
| 266385_at        | AT2G14610_PATHOGENESIS-RELATED GENE 1 (PR1)<br>AT2G26070_REVERSION-TO-ETHYLENE SENSITIVITY1 | 1        |             |
| 266893_at        | (RTE1)                                                                                      | 1        |             |
| 267028_at        | AT2G38470_ (WRKY33)                                                                         | 1        |             |
| 266992_at        | AT2G39200_MILDEW RESISTANCE LOCUS O 12 (MLO12)                                              | 1        |             |
| 260571_at        | AT2G43790_MAP KINASE 6 (MPK6);MAP KINASE 6 (MAPK6)                                          | 1        |             |
| 258189_at        | AT3G17860_JASMONATE-ZIM-DOMAIN PROTEIN 3 (JAZ3)                                             | 1        |             |
| 258046_at        | AT3G21220_ (ATMKK5)                                                                         | 1        |             |
| 257868_at        | AT3G25070_RPM1 INTERACTING PROTEIN 4 (RIN4)                                                 | 1        |             |
| <b>252373_at</b> | <b>AT3G48090_enhanced disease susceptibility 1 (EDS1)</b>                                   | <b>1</b> | <b>CT04</b> |
| 250928_at        | AT5G03280_ETHYLENE INSENSITIVE 2 (EIN2)                                                     | 1        |             |
| <b>245690_at</b> | <b>AT5G04230_PHENYL ALANINE AMMONIA-LYASE 3 (PAL3)</b>                                      | <b>1</b> | <b>CT04</b> |
| <b>246082_at</b> | <b>AT5G20480_EF-TU RECEPTOR (EFR)</b>                                                       | <b>1</b> | <b>CT03</b> |
| <b>249645_at</b> | <b>At5g36910_THIONIN 2.2 (THI2.2)</b>                                                       | <b>1</b> | <b>CT03</b> |
| 249754_at        | AT5G24530_DOWNY MILDEW RESISTANT 6 (DMR6)                                                   | 1        |             |
| 264595_at        | AT1G04750_VESICLE-ASSOCIATED MEMBRANE PROTEIN 721                                           | 2        |             |
| 261892_at        | AT1G80840_ (ATWRKY40)                                                                       | 2        |             |
| 245168_at        | AT2G33150_(KAT2)                                                                            | 2        |             |
| 267392_at        | AT2G44490_penetration 2 (PEN2);BETA GLUCOSIDASE 26 (BGLU26)                                 | 2        |             |
| <b>258791_at</b> | <b>At3g04720_PATHOGENESIS-RELATED 4 (PR4)</b>                                               | <b>2</b> | <b>CT07</b> |
| 258786_at        | AT3G11820_PENETRATION1 (PEN1)                                                               | 2        |             |
| 252592_at        | AT3G45640_ (ATMAPK3)                                                                        | 2        |             |
| 254918_at        | AT4G11260_ENHANCED DOWNY MILDEW 1 (EDM1); (SGT1B)                                           | 2        |             |
| <b>254889_at</b> | <b>At4g11650_osmotin 34 (ATOSM34)</b>                                                       | <b>2</b> | <b>CT08</b> |
| 253993_at        | AT4G26070_ (MKK1)                                                                           | 2        |             |
| 253377_at        | AT4G33300_ADR1-like 1 (ADR1-L1)                                                             | 2        |             |
| 246600_at        | AT5G14930_SENESCENCE-ASSOCIATED GENE 101                                                    | 2        |             |
| <b>249560_at</b> | <b>At5g38330_Low-molecular-weight cysteine-rich 80 (LCR80)</b>                              | <b>2</b> | <b>CT08</b> |
| <b>248895_at</b> | <b>AT5G46330_FLAGELLIN-SENSITIVE 2 (FLS2)</b>                                               | <b>2</b> | <b>CT07</b> |
| <b>247571_at</b> | <b>AT5G61210_ (SNAP33)</b>                                                                  | <b>2</b> | <b>CT07</b> |
| 262455_at        | AT1G11310_MILDEW RESISTANCE LOCUS O 2 (MLO2)                                                | 4        |             |
| 262344_at        | AT1G64060_RESPIRATORY BURST OXIDASE PROTEIN F (ATRBOH F)                                    | 4        |             |
| 266119_at        | At2g02100_(PDF2.2)                                                                          | 4        |             |
| 258173_at        | AT3G21630_Chitin Elicitor Receptor Kinase 1 (CERK1)                                         | 4        |             |

|                  |                                                          |          |             |
|------------------|----------------------------------------------------------|----------|-------------|
| 250421_at        | AT5G11270_OVEREXPRESSOR OF CATIONIC PEROXIDASE 3 (OCP3)  | 4        |             |
| 248994_at        | AT5G45250_RESISTANT TO P. SYRINGAE 4 (RPS4)              | 4        |             |
| <b>248247_at</b> | <b>AT5G53210_SPEECHLESS (SPCH)</b>                       | <b>4</b> | <b>CT09</b> |
| <b>247786_at</b> | <b>AT5G58600_POWDERY MILDEW RESISTANT 5 (PMR5)</b>       | <b>4</b> | <b>CT10</b> |
| 264405_at        | AT1G10210_(ATMPK1)                                       | 5        | CT07        |
| 261662_at        | AT1G18350_MAP KINASE KINASE7 (ATMKK7)                    | 5        | CT20        |
| 262899_at        | AT1G59870_PENETRATION 3 (PEN3)                           | 5        | CT09        |
| 263786_at        | AT2G46370_JASMONATE RESISTANT 1 (JAR1)                   | 5        |             |
| 258544_at        | AT3G07040_(RPM1)                                         | 5        | CT11        |
| 259149_at        | AT3G10340_Phenylalanine ammonia-lyase 4 (PAL4)           | 5        |             |
| 256243_at        | At3g12500_BASIC CHITINASE (CHI-B); (B-CHI)               | 5        | CT06        |
| 258434_at        | AT3G16770_ETHYLENE RESPONSE FACTOR 72 (ERF72)            | 5        | CT10        |
| 255568_at        | AT4G01250_(WRKY22); (AtWRKY22)                           | 5        | CT05        |
| 253535_at        | AT4G31550_(AtWRKY11)                                     | 5        |             |
| 249052_at        | At5g44420_PLANT DEFENSIN 1.2 (PDF1.2)                    | 5        | CT12        |
| 264780_at        | AT1G08720_ENHANCED DISEASE RESISTANCE 1 (EDR1); (ATEDR1) | 5        |             |
| 261150_at        | AT1G19640_JASMONIC ACID CARBOXYL METHYLTRANSFERASE (JMT) | 10       | CT20        |
| 259719_at        | At1g61070_PLANT DEFENSIN 2.4 (PDF2.4)                    | 10       | CT21        |
| 245051_at        | AT2G23320_(WRKY15)                                       | 10       | CT19        |
| 267188_at        | AT2G44050_COI1 SUPPRESSOR1 (COS1)                        | 10       |             |
| 258002_at        | At3g28930_AVRPPT2-INDUCED GENE 2 (AIG2)                  | 10       |             |
| 245986_at        | AT5G13160_avrPphB susceptible 1 (PBS1)                   | 10       |             |
| 248684_at        | AT5G48485_DEFECTIVE IN INDUCED RESISTANCE 1 (DIR1)       | 10       | CT18        |
| 256183_at        | AT1G51660_(MKK4)                                         | 10       |             |
| 261569_at        | AT1G01060_LATE ELONGATED HYPOCOTYL (LHY)                 | 11       |             |
| 262177_at        | AT1G74710_ISOCHORISMATE SYNTHASE 1 (ICS1)                | 11       | CT23        |
| 262679_at        | At1g75830_PLANT DEFENSIN 1.2 (PDF1.1)                    | 11       |             |
| 266118_at        | At2g02130_(PDF2.3)                                       | 11       | CT00        |
| 267346_at        | AT2G39940_CORONATINE INSENSITIVE 1 (COI1)                | 11       |             |
| 266719_at        | AT2G46830_CIRCADIAN CLOCK ASSOCIATED 1 (CCA1)            | 11       |             |
| 251984_at        | AT3G53260_PHENYLALANINE AMMONIA-LYASE 2 (PAL2)           | 11       | CT22        |
| 246510_at        | AT5G15410_DEFENSE NO DEATH 1 (DND1)                      | 11       |             |
| 247259_at        | AT5G64930_CONSTITUTIVE EXPRESSION OF PR GENES 5 (CPR5)   | 11       |             |
| 252921_at        | AT4G39030_ENHANCED DISEASE SUSCEPTIBILITY 5 (EDS5)       | 11       |             |
| 259451_at        | AT1G13890_(SNAP30)                                       |          | CT00        |
| 256017_at        | AT1G19180_JASMONATE-ZIM-DOMAIN PROTEIN 1 (JAZ1)          |          | CT00        |
| 245731_at        | AT1G73500_MAP KINASE KINASE 9 (MKK9)                     |          | CT00        |
| 260060_at        | At1g73680_ALPHA DIOXYGENASE (ALPHA DOX2)                 |          | CT00        |
| 260116_at        | AT1G33960_AVRPPT2-INDUCED GENE 1 (AIG1)                  |          | CT01        |
|                  | At3g15210_ETHYLENE RESPONSIVE ELEMENT BINDING            |          | CT01        |
| 257053_at        | FACTOR 4 (ATERF-4)                                       |          |             |
| 245038_at        | At2g26560_PHOSPHOLIPASE A 2A (PLP2)                      |          | CT03        |
| 253997_at        | AT4G26090_RESISTANT TO P. SYRINGAE 2 (RPS2)              |          | CT03        |
| 266992_at        | AT2G39200_MILDEW RESISTANCE LOCUS O 12 (MLO12)           |          | CT03        |
| 251864_at        | AT3G54920_powdery mildew resistant 6 (PMR6)              |          | CT08        |
| 261713_at        | AT1G32640_JASMONATE INSENSITIVE 1 (JIN1); (MYC2))        |          | CT11        |

|           |                                                          |      |
|-----------|----------------------------------------------------------|------|
| 257927_at | AT3G23240_ETHYLENE RESPONSE FACTOR 1 (ERF1)              | CT15 |
| 265530_at | AT2G06050_OPDA-REDUCTASE 3 (OPR3)                        | CT15 |
| 253485_at | AT4G31800_(WRKY18)                                       | CT16 |
| 264608_at | AT1G04710_3-KETO-ACYL-COA THIOLASE 1 (KAT1)              | CT16 |
| 266141_at | At2g02120_(PDF2.1)                                       | CT18 |
| 261564_at | AT1G01720_(ATAF1)                                        | CT18 |
| 254232_at | AT4G23600_CORONATINE INDUCED 1 (COR13)                   | CT18 |
| 249208_at | AT5G42650_ALLENE OXIDE SYNTHASE (AOS)                    | CT18 |
| 255786_at | AT1G19670_CORONATINE-INDUCED PROTEIN 1 (ATCLH1)          | CT20 |
| 257365_at | At2g26020_plant defensin 1.2b (PDF1.2b)                  | CT20 |
| 252060_at | AT3G52430_PHYTOALEXIN DEFICIENT 4 (PAD4)                 | CT20 |
| 254652_at | AT4G18170_(AtWRKY28)                                     | CT21 |
| 251705_at | AT3G56400_(WRKY70)                                       | CT23 |
| 259561_at | AT1G21250_CELL WALL-ASSOCIATED KINASE (WAK1);<br>(PRO25) | CT23 |
